# Supplementary material for: C-kit induces epithelial-mesenchymal transition and contributes to salivary adenoid cystic cancer progression
Source: PubMed Central journal article supplement (PMC4039226; doi:10.18632/oncotarget.1606), 2014-01-06
Supplement: oncotarget-05-1491-s002.pdf [file oncotarget-05-1491-s002.pdf]

**C-kit induces epithelial–mesenchymal transition and contributes to salivary adenoid cystic cancer progression – Tang et al**

**Table S1 shRNA sequences of c-kit**

| <b>Gene</b> | <b>Sequence(5'-3')</b>                                                        |
|-------------|-------------------------------------------------------------------------------|
| c-kit       | 5' -GATCCGtctagccagagacatcaagTTCAAGAGActtgatgtctctggctag<br>aTTTTTTACGCGTG-3' |
| c-kit       | 5' -GATCCGtcagcacatggattcgcaaTTCAAGAGAttgcgaatccatgtgctg<br>aTTTTTTACGCGTG-3' |
| Negative    | aTTTTTTACGCGTG-3'                                                             |

**Table S2 Gene primers of RT-PCR**

| <b>Gene</b> | <b>Forward primer (5'-3')</b> | <b>Reverse primer (5'-3')</b> |
|-------------|-------------------------------|-------------------------------|
| c-kit       | ATTTTCTCTGCGTTCTGCTCCTAC      | CGCCCACGCGGACTATTA            |
| Slug        | TGATGAAGAGGAAAGACTACAG        | GCTCACATATTCCTTGTCACAG        |
| Snail1      | GCTCCACAAGCACCAAGAGT          | CATGGCAGTGAGAAGGATGT          |
| E-cadherin  | CCCATCAGCTGCCAGAAAATGAA       | CTGTCACCTTCAGCCATCCTGTTT      |
| N-cadherin  | CCGACGAATGGATGAAAGACC         | TTGCAGCCTATGCCAAAGC           |
| Vimentin    | GAGAACTTTGCCGTTGAAGC          | GCTTCCTGTAGGTGGCAATC          |
| TGF-β1      | CCAACTATTGCTTCAGCTCCA         | TTATGCTGGTTGTACAGGG           |
| ZEB1        | TGCACTGAGTGTGAAAAGC           | TGGTGATGCTGAAAGAGACG          |
| ZEB2        | CGCTTGACATCACTGAAGGA          | CTTGCCACACTCTGTGCATT          |
| Prrx1       | GGATCCACCATGACCTCCAGCTACGGCA  | GAATTCTCAGTTGACTGTTGGCACCT    |
| HOXB7       | CCAGCCTCAAGTTCGGTTTTT         | CCCGAACCCGCTCCATAG            |
| GAPDH       | ATGACCCCTTCATTGACCTCA         | GAGATGATGACCCTTTTGGCT         |

**Table S3 Clinicopathological features of the ACC patients (n=121)**

| <b>Clinicopathological features</b> | <b>No. of cases</b> |
|-------------------------------------|---------------------|
| Age(years) at diagnosis             | 121                 |
| <50                                 | 45                  |
| ≥50                                 | 76                  |
| Sex                                 | 121                 |
| Female                              | 67                  |
| Male                                | 54                  |
| Complaints, months                  | 121                 |
| <12                                 | 64                  |
| ≥12                                 | 57                  |
| Site                                | 121                 |
| Minor salivary gland                | 63                  |
| Major salivary gland                | 58                  |
| Histological subtype                | 121                 |
| Tubular/ Cribiform                  | 85                  |
| Solid                               | 36                  |
| Resection margins                   | 121                 |
| Free                                | 88                  |
| Affected                            | 33                  |
| TNM stage                           | 121                 |
| I- II                               | 34                  |
| III-IV                              | 87                  |
| Perineural invasion                 | 100                 |
| Yes                                 | 47                  |
| No                                  | 53                  |
| Local regional recurrence           | 121                 |
| Yes                                 | 30                  |
| No                                  | 91                  |
| Distant metastasis                  | 103                 |
| Yes                                 | 39                  |
| No                                  | 64                  |
